# Supplementary material for: REST/NRSF Knockdown Alters Survival, Lineage Differentiation and Signaling in Human Embryonic Stem Cells
Source: PubMed Central journal article supplement (PMC4699193; doi:10.1371/journal.pone.0145280), 2015-12-21

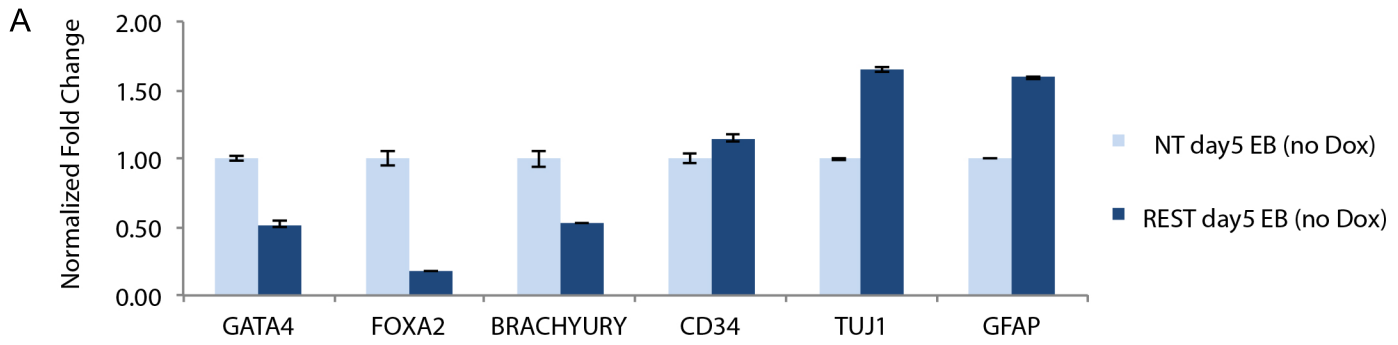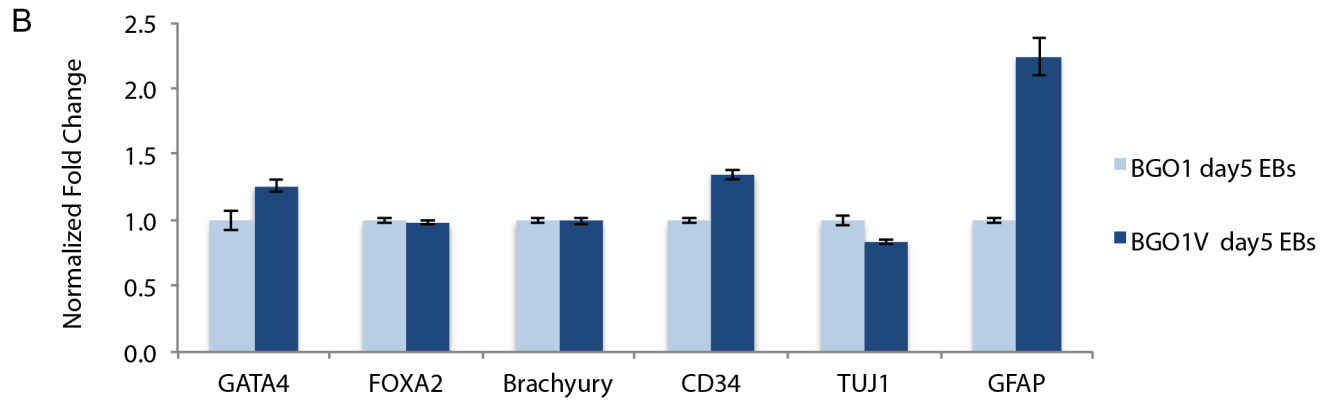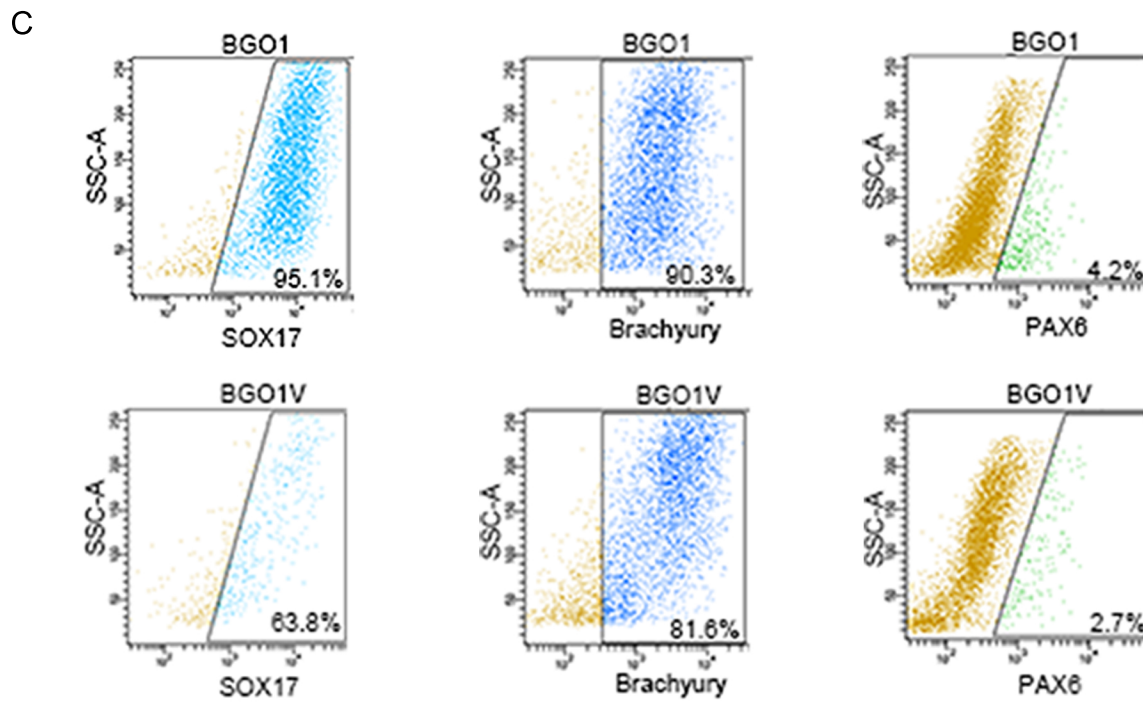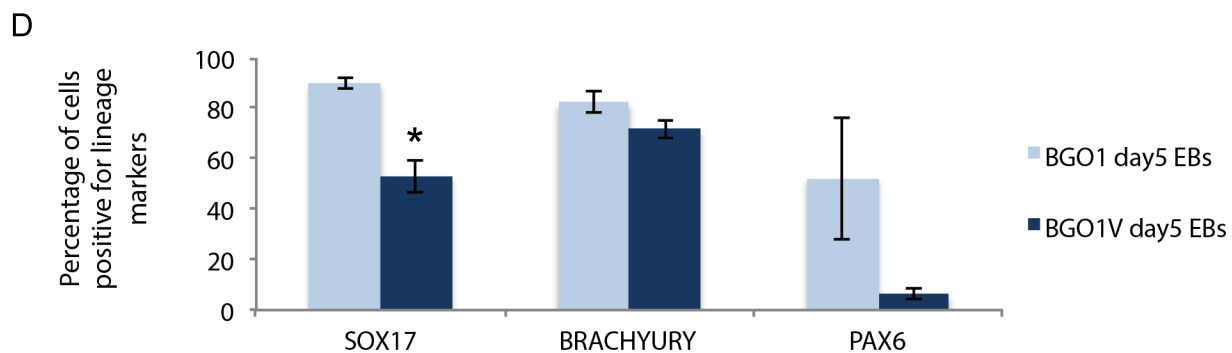

Supplement: pone.0145280.s003.pdf [file pone.0145280.s003.pdf]
